# Supplementary material for: α-Cyclodextrins Polyrotaxane Loading Silver Sulfadiazine
Source: PubMed Central journal article supplement (PMC6415174; doi:10.3390/polym10020190), 2018-02-14
Supplement: polymers-10-00190-s001.pdf [file polymers-10-00190-s001.pdf]

# $\alpha$ -Cyclodextrins Polyrotaxane Loading Sliver Sulfadiazine

Sa Liu <sup>1,2</sup>, Chunting Zhong <sup>1,2</sup>, Weiwei Wang <sup>1,2</sup>, Yongguang Jia <sup>1,2</sup>, Lin Wang <sup>1,2</sup> and Li Ren <sup>1,2,\*</sup>

<sup>1</sup> School of Materials Science and Engineering, South China University of Technology, Guangzhou 510641, China; sliu@scut.edu.cn (S.L.); msctzhong@mail.scut.edu.cn (C.Z.); wei880719@163.com (W.W.); ygjia@scut.edu.cn (Y.J.); wanglin3@scut.edu.cn (L.W.)

<sup>2</sup> National Engineering Research Center for Tissue Restoration and Reconstruction, Guangzhou 510006, China

\* Correspondence: psliren@scut.edu.cn; Tel.: +86-20-2223-6528

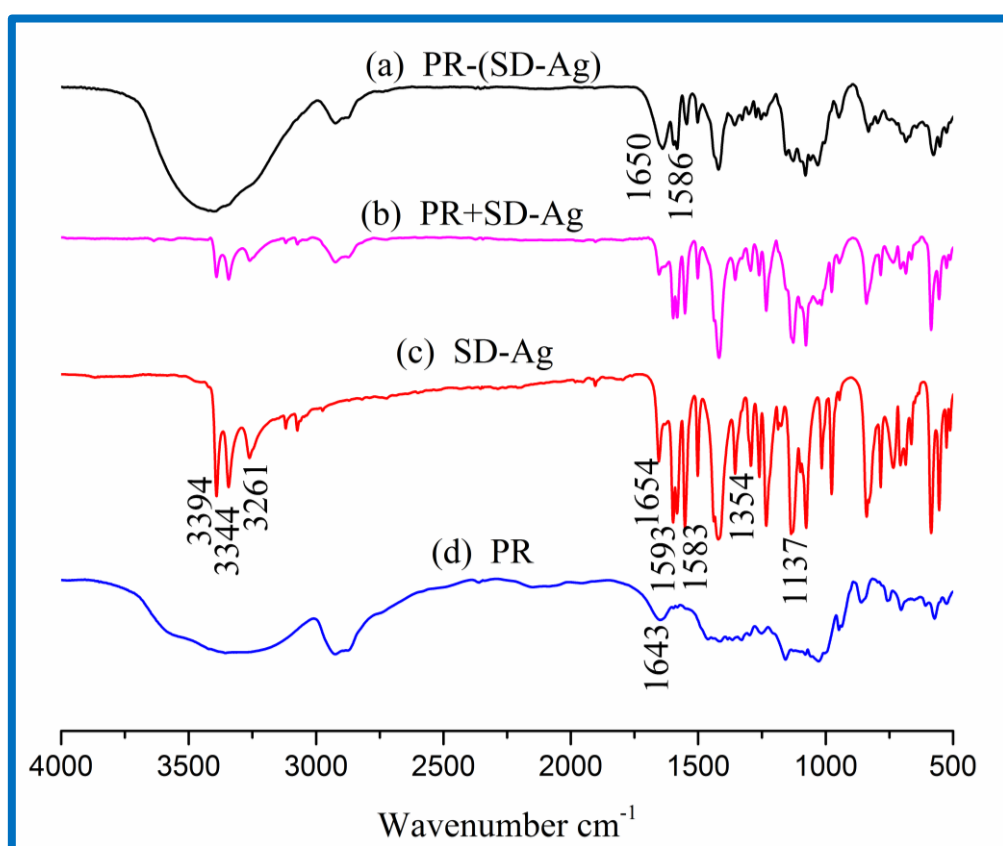

**Figure S1.** The FTIR spectra of PR, SD-Ag, PR+SD-Ag and PR-(SD-Ag).

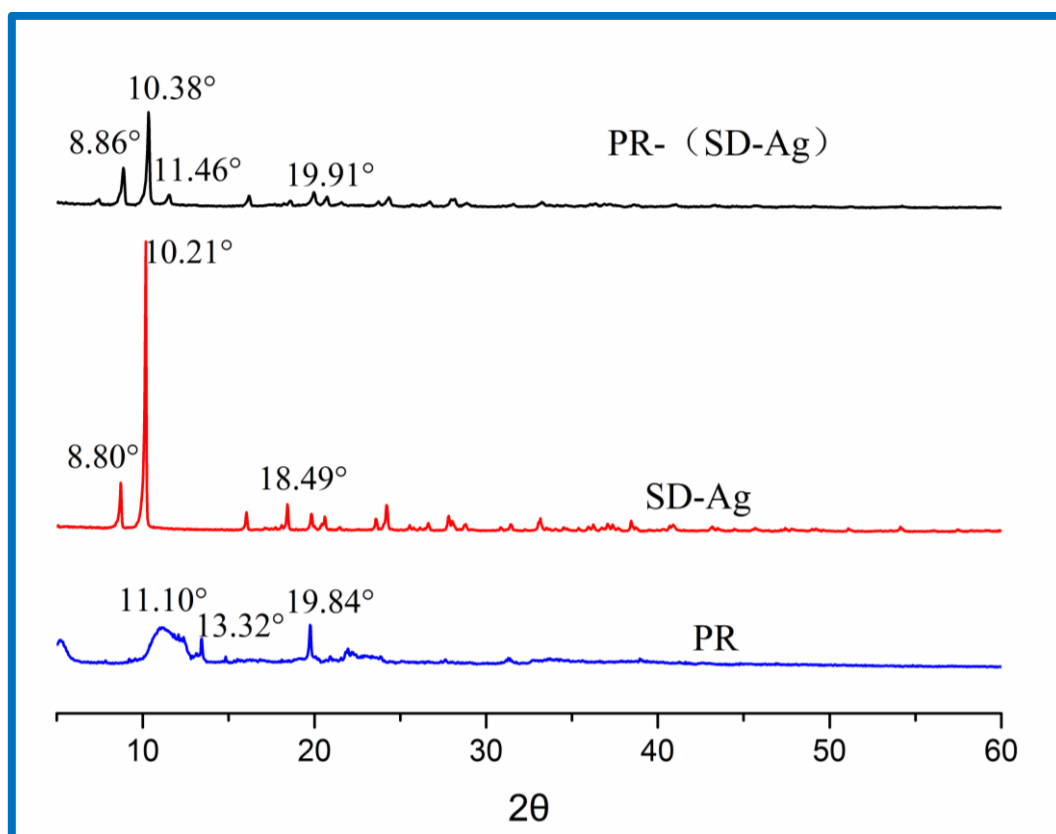

**Figure S2** The XRD patterns of PR-(SD-Ag), SD-Ag and PR.

**Table S1** Antibacterial rate of PR<sub>1 t-</sub> (SD-Ag) and PR<sub>2 t-</sub> (SD-Ag) on E.coli and S.aureus.

| Samples                      | PR/SD-Ag 1:1 |          | PR/SD-Ag 1.5:1 |          | PR/SD-Ag 2:1 |          |
|------------------------------|--------------|----------|----------------|----------|--------------|----------|
|                              | P(%)         | P(%)     | P(%)           | P(%)     | P(%)         | P(%)     |
|                              | E.coli       | S.aureus | E.coli         | S.aureus | E.coli       | S.aureus |
| PR <sub>1 1h-</sub> (SD-Ag)  | 98.5         | 98.5     | 98.3           | 98.4     | 98.2         | 98.1     |
| PR <sub>1 24h-</sub> (SD-Ag) | 98.9         | 98.8     | 98.6           | 98.6     | 98.4         | 98.3     |
| PR <sub>1 48h-</sub> (SD-Ag) | 99.1         | 99.2     | 98.9           | 98.9     | 98.7         | 98.6     |
| PR <sub>2 1h-</sub> (SD-Ag)  | 99.1         | 98.9     | 98.8           | 98.6     | 98.6         | 98.4     |
| PR <sub>2 24h-</sub> (SD-Ag) | 99.5         | 99.1     | 99.1           | 98.9     | 98.9         | 98.7     |
| PR <sub>2 48h-</sub> (SD-Ag) | 99.9         | 99.6     | 99.5           | 99.3     | 99.2         | 99.1     |

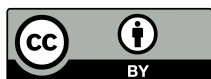

© 2018 by the authors. Submitted for possible open access publication under the terms and conditions of the Creative Commons Attribution (CC BY) license (<http://creativecommons.org/licenses/by/4.0/>).
